# Supplementary material for: Synthesis of highly dispersed Nb2O5–graphene heterojunction composites using ethylene diamine tetraacetic acid and boron-functionalized graphene quantum dots for symmetrical flexible supercapacitors with ultrahigh energy density
Source: Royal Society of Chemistry journal article supplement (doi:10.1039/d2nj05554f), 2022-12-29
Supplement: d2nj05554f1.pdf [file d2nj05554f1.pdf]

## Supporting Information (SI)

# Synthesis of highly dispersed Nb<sub>2</sub>O<sub>5</sub>-graphene heterojunction composite using ethylene diamine tetraacetic acid and boron-functionalized graphene quantum dot for flexible symmetrical supercapacitors with ultrahigh energy density

Liu Xiaoyue, Xu Pengwu, Li Ruiyi, Zhu Haiyan, Liu Xiaohao and Li Zaijun\*

*Key Laboratory of Synthetic and Biological Colloids, Ministry of Education, School of Chemical and Material Engineering, and School of Life Science and Health Engineering, Jiangnan University, Wuxi 214122, China*

## 1. Experimental

### 1.1. Materials and reagents

Niobium pentachloride (NbCl<sub>5</sub>), citric acid, ethylenediamine, ethylenediamine tetraacetic acid (EDTA), boric acid (H<sub>3</sub>BO<sub>3</sub>) and ascorbic acid (AA) were purchased from Sigma-Aldrich Chemical Company. Graphite oxide (GO) was prepared from natural graphite by the modified Hummers' method [1]. The solid electrolyte (PVA/Li<sub>2</sub>SO<sub>4</sub>) was prepared by adding 2.0 g of polyvinyl alcohol (PVA) in 20 mL of ultrapure water [1]. Kept it at room temperature for 24 h and then heated at 75°C with stirring until a clear homogeneous solution was formed. After that, dropped 10 mL of 3 mol L<sup>-1</sup> Li<sub>2</sub>SO<sub>4</sub> solution under stirring and cool down to room temperature. Silver nanowires (Ag NW) in isopropanol (5 mg mL<sup>-1</sup>) was purchased from Jiangsu XFNANO Materials Tech Co., Ltd. A n-Nb<sub>2</sub>O<sub>5</sub>-p-GQD-G ink was prepared by dispersing a solid sample containing 80 wt.% n-Nb<sub>2</sub>O<sub>5</sub>-p-GQD-G and 20 wt.% acetylene black in the above solid electrolyte under ultrasonication.

## **1.2. Material characterization**

Scanning electron microscope (SEM) was carried out in HITACHI S4800 field emission scanning electron microscope. Transmission electron microscope (TEM) was conducted on a JEOL 2010 transmission electron microscope at 200 keV. High-angle annular dark field scanning transmission electron microscopy (HAADF-STEM) was conducted by FEI Themis Z microscope with 200 kV accelerating voltage. STEM samples were prepared by depositing a droplet of suspension onto a Cu grid coated with lacey carbon film. The sample was prepared by dispensing a small amount of dry powder in ethanol. Then, one drop of the suspension was dropped on 300 mesh copper. The TEM grid covered with thin amorphous carbon film. X-ray diffraction (XRD) pattern was measured on the X-ray D8 Advance Instrument operated at 40 kV and 20 mA and using Cu K $\alpha$  radiation source with  $\lambda=0.15406$  nm. X-Ray photoelectron spectroscopy (XPS) were carried out in a PHI 5700 ESCA spectrometer with mono chromated Al KR radiation.

## **2.3. Electrochemical measurements**

Three-electrode test system and flexible supercapacitor were employed for evaluating the supercapacitor performance of n-Nb<sub>2</sub>O<sub>5</sub>-p-GQD-G. In the three-electrode testing system, the titanium sheet (1cm $\times$ 1cm) bearing n-Nb<sub>2</sub>O<sub>5</sub>-p-GQD-G, platinum foil (1cm $\times$ 1cm) and saturated calomel electrode were used as working electrode, counter electrode and reference electrode, respectively. A 1.0 mol L<sup>-1</sup> Li<sub>2</sub>SO<sub>4</sub> aqueous solution was used as an electrolyte. The working electrode was constructed by coating the mixture of 85 wt.% n-Nb<sub>2</sub>O<sub>5</sub>-p-GQD-G, 10 wt.% acetylene black and 5wt.% polyvinylidene fluoride as a binder dissolved in N-methyl-pyrrolidone. The active mass coated on the each of titanium sheet electrodes was in the range of 1-2 mg cm<sup>-2</sup>. Before use, the electrodes were dried in vacuum at 85 °C for 24 h.

Cyclic voltammogram (CV), electrochemical impedance spectroscopy (EIS) and galvanostatic charge/discharge curves of three-electrode testing system and flexible supercapacitor were

measured on the CHI 660D electrochemical workstation. The potential amplitude of  $\pm 5$  mV and frequency of 0.01-10<sup>5</sup> Hz were adopted in the EIS measurements. For the three-electrode system, the specific capacitance ( $C_g$ , based on a single electrode) were calculated according to the equation (1) [3]:

$$C_g = \frac{It}{m\Delta V} \quad (1)$$

Here,  $C_g$  is the gravimetric capacitance ( $F g^{-1}$ ),  $I$  is the current (A),  $m$  is the active mass on the electrode (g),  $\Delta V$  is the potential range, and  $t$  is the discharging time. For the symmetric supercapacitor, the specific capacitance ( $C_{g2}$ ), energy density and power density were calculated according to the equations (2, 3 and 4) [4]:

$$C_{g2} = \frac{2It}{m\Delta V} \quad (2)$$

$$E_g = \frac{C_{g2}\Delta V^2}{8 \times 3600} \quad (3)$$

$$P_g = \frac{E_{g2} \times 3600}{t_{discharge}} \quad (4)$$

Here,  $C_g$  is the gravimetric capacitance ( $F g^{-1}$ ) of a single electrode in two-electrode cell. Furthermore,  $E_g$  ( $W h g^{-1}$ ) and  $P_g$  ( $W g^{-1}$ ) are the gravimetric energy density and gravimetric power density, respectively, based on the total active material in the cell.  $I$  is the current (A),  $m$  is the active mass of active material in a single electrode (g),  $\Delta V$  is the potential range, and  $t$  is the discharging time.

## 2. Figures

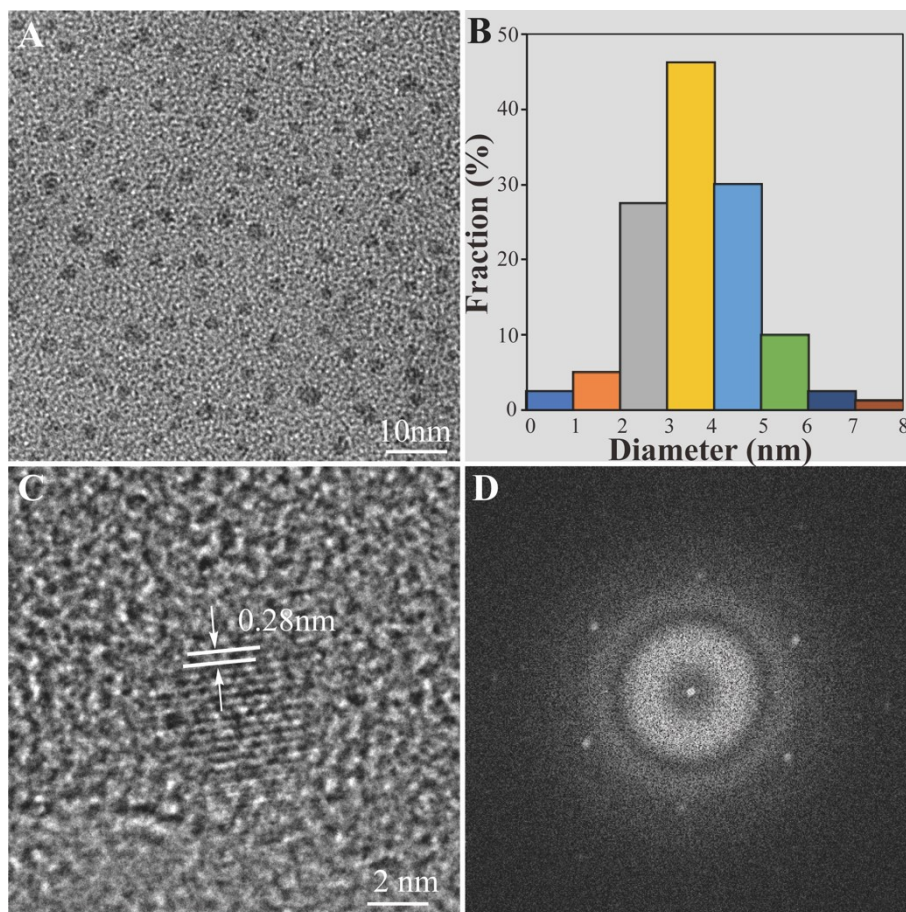

**Fig. s1** TEM image(A), particle size distribution (B), HRTEM (C) and electron diffraction pattern (D) of the as-synthesized p-GQD

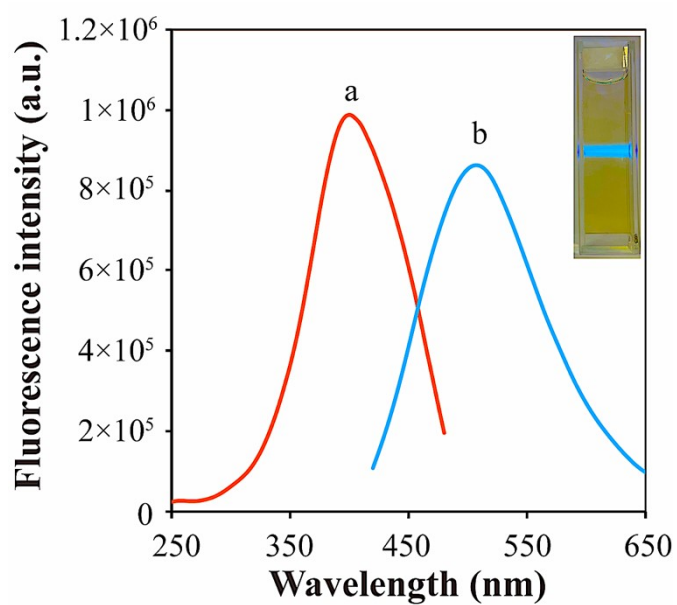

**Fig. s2** The fluorescence excitation spectrum (a) and emission spectrum (b) of p-GQD

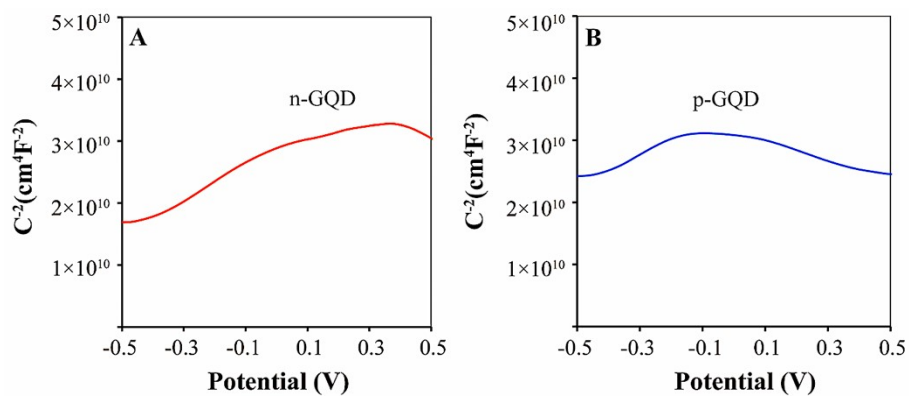

**Fig. s3** The Mott-Schottky plots of n-GQD and p-GQD

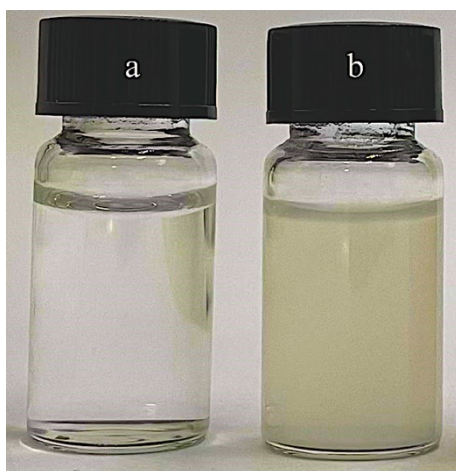

**Fig. s4** Optical photographs of water (a) and  $\text{NbCl}_5$  aqueous solution (b)

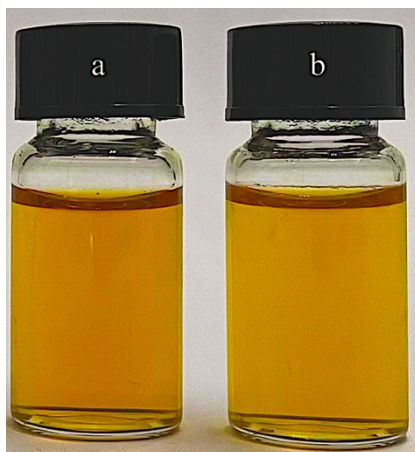

**Fig. s5** Optical photographs of p-GQD aqueous solution (a) and  $\text{NbCl}_5$  in p-GQD aqueous solution (b)

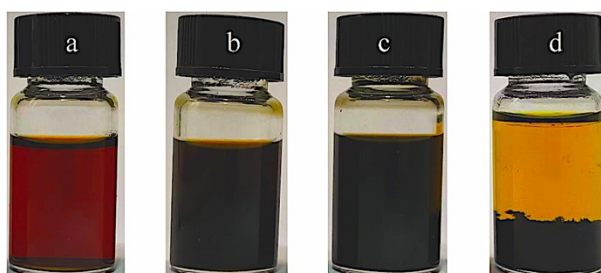

**Fig. s6** Optical photographs of p-GQD before (a) and after added p-GQD/GO (b),  $\text{NbCl}_5$  (c) and ascorbic acid (d)

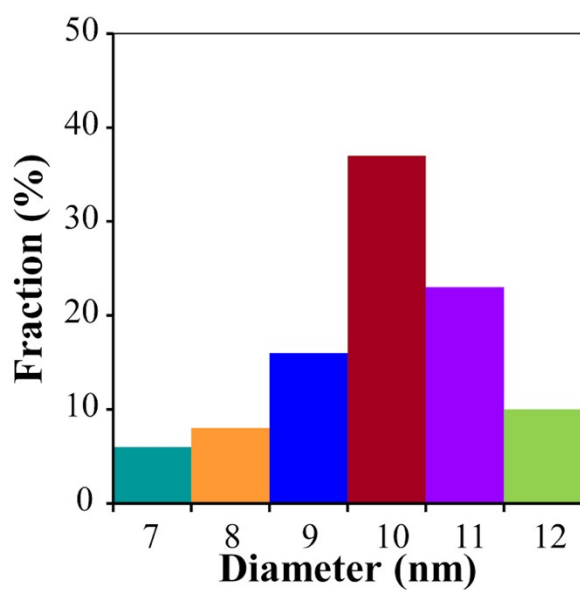

**Fig. s7** The length distribution of  $\text{Nb}_2\text{O}_5$  nanorods in n- $\text{Nb}_2\text{O}_5$ -p-GQD-G

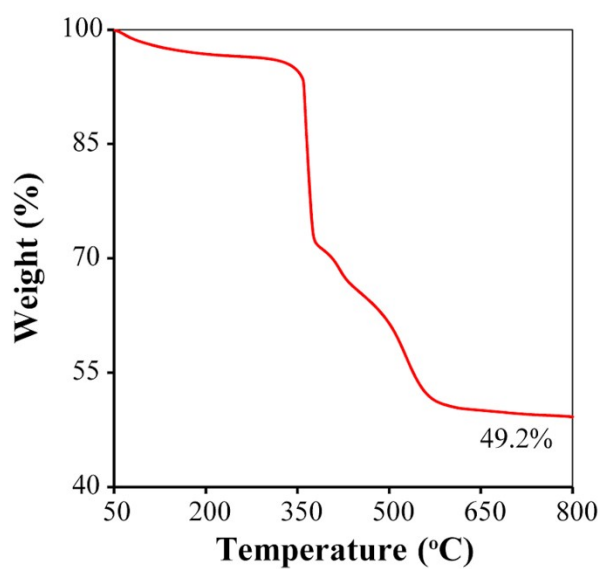

**Fig. s8** Thermogravimetric curve of n- $\text{Nb}_2\text{O}_5$ -p-GQD-G

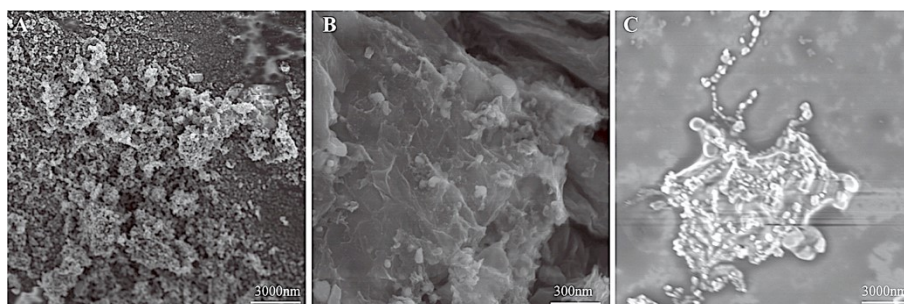

**Fig. s9** The SEM images of  $\text{Nb}_2\text{O}_5$  nanoparticles formed in the absence of p-GQD and GO (A), p-GQD (B) and GO (C)

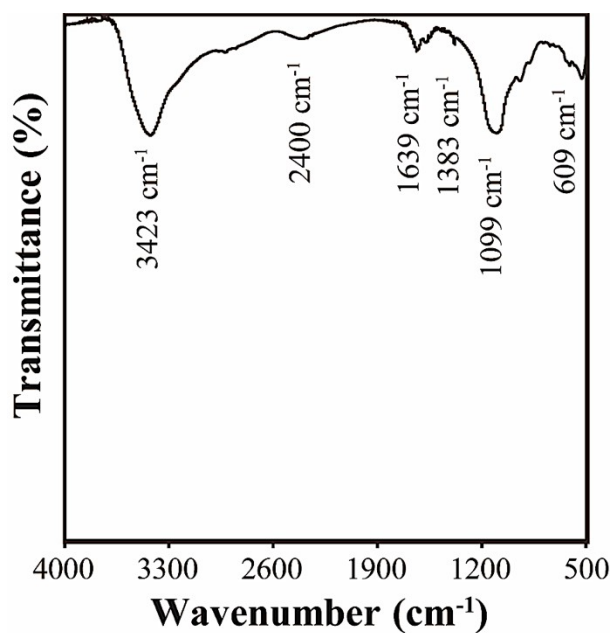

Fig. s10 IR spectrum of n-Nb<sub>2</sub>O<sub>5</sub>-p-GQD-G

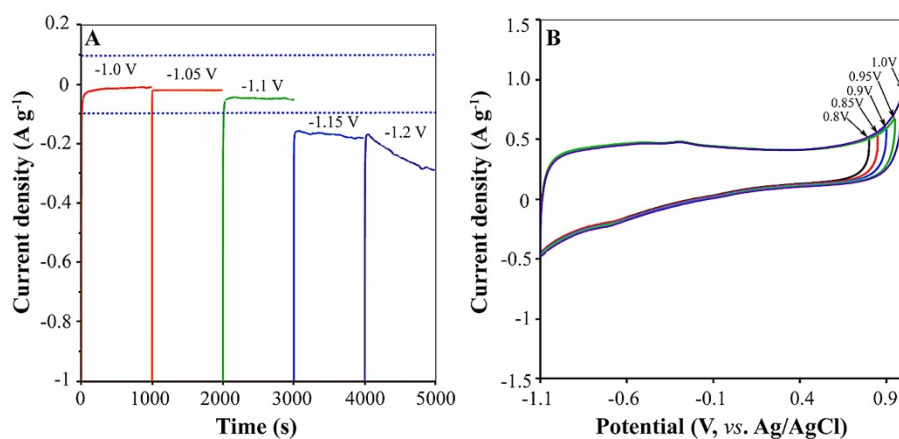

Fig. s11 Chronoamperometry curves (A) of n-Nb<sub>2</sub>O<sub>5</sub>-p-GQD-G electrode in 1 M Li<sub>2</sub>SO<sub>4</sub> electrolyte at various potentials and CV curves (B) in 1 M Li<sub>2</sub>SO<sub>4</sub> electrolyte of n-Nb<sub>2</sub>O<sub>5</sub>-p-GQD-G electrode within various potential ranges

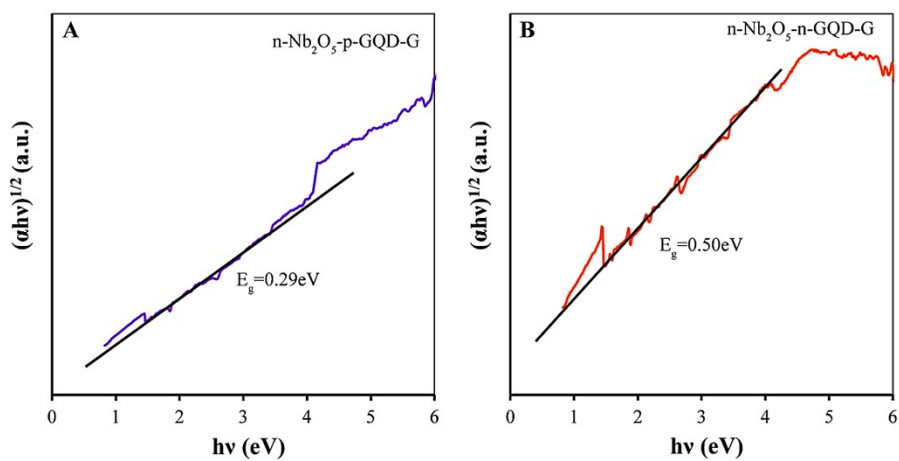

Fig. s12 The relationship curves of  $(\alpha hv)^{1/2}$  with  $hv$  for n-Nb<sub>2</sub>O<sub>5</sub>-p-GQD-G (A) and n-Nb<sub>2</sub>O<sub>5</sub>-n-GQD-G (B)



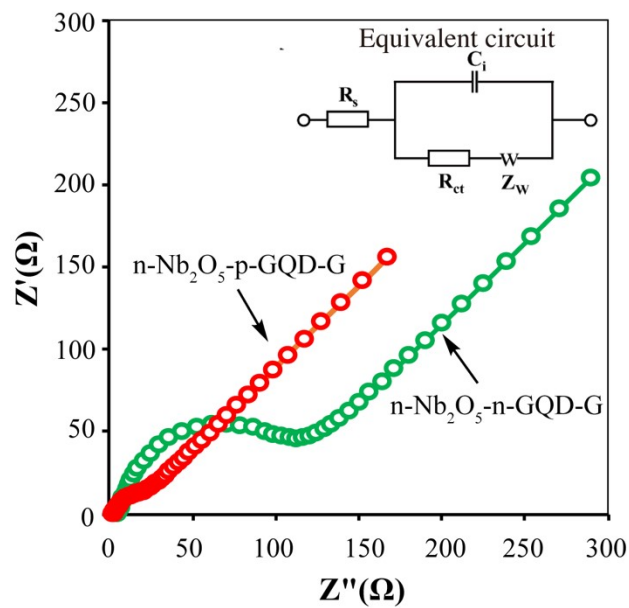

**Fig. s13** EIS curves of n-Nb<sub>2</sub>O<sub>5</sub>-p-GQD-G and n-Nb<sub>2</sub>O<sub>5</sub>-n-GQD-G in 1M H<sub>2</sub>SO<sub>4</sub> solution

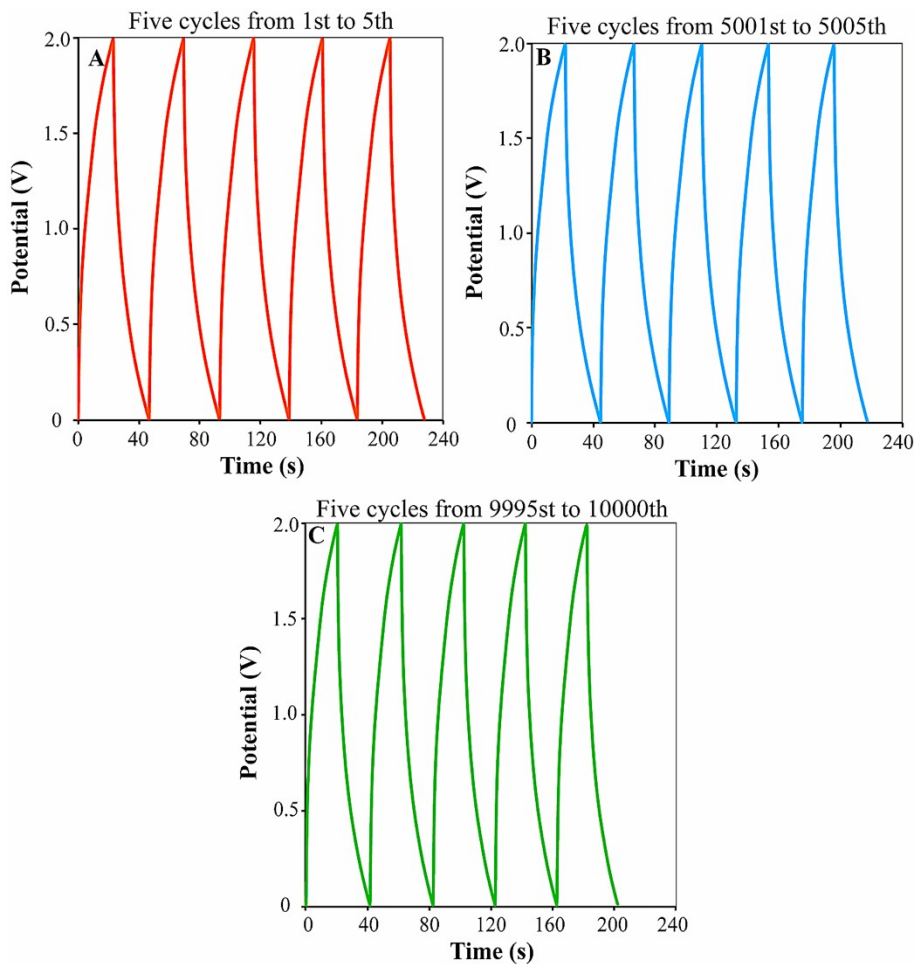

**Fig. s14** The charge-discharge curves for the five cycles from 1<sup>st</sup> to 5<sup>th</sup>, the five cycles from 5001<sup>th</sup> to 5005<sup>th</sup>, and the five cycles from 9995<sup>th</sup> to 10000<sup>th</sup>

## References



- [1] N.N. Li, R.Y. Li, Q.S. Wang, Y.Q. Yang, X.L. Sun, G.L. Wang, Z.J. Li, Colorimetric detection of chlorpyrifos in peach based on cobalt-graphene nanohybrid with excellent oxidase-like activity and reusability, *J. Hazard. Mater.*, **2021**, 415, 125752.
- [2] R.Y. Li, K.Y. He, Y.Q. Yang, H.Y. Zhu, **Z.J. Li**, Atomically dispersed RuO<sub>2</sub>-tryptophan functionalized graphene quantum dot-graphene hybrid with double Schottky heterojunctions for high performance flexible supercapacitors, *Chem. Eng. J.*, **2021**, 426, 130893.
- [3] X. Wang, C.Y. Yan, J. Yan, A. Sumboja, P.S. Lee, Orthorhombic niobium oxide nanowires for next generation hybrid supercapacitor device, *Nano Energy*, **2015**, 11, 765-772.
- [4] Y. Dai, L.P. Ma, J.Q. Hu, J.H. Wang, H. Yan, H.Y. Zhang, H.Q. Wang, C.Y. Lai, W.R. Li, J.C. Zheng, Highly porous niobium oxide/carbon matrix materials with distinct pseudocapacitive performances in aqueous electrolytes, *Electrochim. Acta*, **2021**, 371, 137792.
